# Supplementary material
Source: publisher figshare collection journal article supplement (https://rs.figshare.com/ndownloader/files/16636616)
Supplement: Supplementary file 1 [file 16636616]

**Gabriela Castellanos-Morales, Karen Y. Ruiz-Mondragón, Helena S. Hernández-Rosales, Guillermo Sánchez-de la Vega, Niza Gámez, Erika Aguirre-Planter, Salvador Montes-Hernández, Rafael Lira-Saade, Luis E. Eguiarte. Tracing back the origin of pumpkins (*Cucurbita pepo* ssp. *pepo* L.) in Mexico. Proceedings of the Royal Society B. doi: 10.1098/rspb.2019.1440.**

**Supplementary Materials**

**Table S1.** Sampling information for *C. pepo* samples included in the analysis. Group or sspecies: Mexican *C. pepo* ssp. *pepo*, improved varieties, *C. pepo* ssp. *fraterna* and *C. pepo* ssp. *ovifera*; state; locality name; site name; ID number: ---- (new samples obtained for this study), BG (Banco Germoplasma, Instituto Nacional de Investigaciones Forestales, Agrícolas y Pecuarias, Campo Experimental Bajio), MEXU (Herbario Nacional, Instituto de Biología, UNAM), and number of fruits collected from each sampled location; for chloroplast only, sequences from [27] were included in haplotype network: archaeological sample number refers to published lab ID and for modern samples GenBank accession number for chloroplast genomes.

| **Group** | **State** | **Locality** | **Site** | **ID number** | **Number of fruits** |
| --- | --- | --- | --- | --- | --- |
| *Mexican C. pepo* ssp. *pepo* | Chiapas | Jiquipilas | Jiquipilas | GCM-Chi-Jiq | 1 |
| Chiapas | San Cristóbal de las Casas | San Cristóbal de las Casas | GCM-Chi-Cri | 3 |
| Chihuahua | Temosachic | San Isidro | BG CU0898 | 1 |
| Chihuahua | Guadalupe Y Calvo | Baborigame | BG CU0879, BG CU0880 | 2 |
| Durango | Durango | Durango | BG CU0654 | 3 |
| Edo. de México | Jiquipilco | Sta. Cruz Tepezpan | BG CU1114 | 5 |
| Guanajuato | Dolores Hidalgo | Dolores Hidalgo | BG CU0757 | 5 |
| Guanajuato | San José Iturbide | La Escondida | BG CU0568 | 4 |
| Guanajuato | Celaya | San Vicente | BG CU0766 | 5 |
| Hidalgo | Mezquital | Mezquital | HHR-Mez-Mez | 3 |
| Jalisco | Ojuelos De Jalisco | De Moreno | BG CU0759 | 5 |
| Michoacán | Ciudad Hidalgo | La Venta | BG CU0972 | 5 |
| Oaxaca | Yanhuitlan | Sto. Domingo | BG CU1052 | 5 |
| Puebla | San Juan Raya | San Juan Raya | BG CU0281, GGJ029 | 2 |
| Puebla | Tehuacan | Santa Cruz Ajalpa | BG GGJ022, GGJ019 | 2 |
| San Luis Potosí | Villa de Arista | La Piedad | KYRM-SLP-SLP | 2 |
| Tlaxcala | Vicente Guerrero | Españita | GSV-Tlax-Tlax | 2 |
| Tlaxcala | Ixtenco | Ixtenco | HHR-Tlax-Ixte | 1 |
| Zacatecas | Saín Alto | Saín Alto | GCM-Zac-SA | 2 |
| Zacatecas | Zacatecas | Villanueva | GSV-Zac-VN | 3 |
| *Improved varieties* | Sonora | Bahía Kino | Field | Spaghetti | 5 |
| ---- | ---- | Botanical interests | Black beauty zucchini | ---- |
| ---- | ---- | Botanical interests | Delicata honey boat | ---- |
| ---- | ---- | Botanical interests | Early prolific straightneck | ---- |
| ---- | ---- | Botanical interests | Cocozelle | ---- |
| *C. pepo* ssp. *fraterna* | Tamaulipas | ---- | ---- | BG CU0629, BG CU0633 | 2 |
| *C. pepo* ssp. *ovifera* | Texas, USA | Dewitt | Guadalupe River | MEXU 975511 | 1 |
| ---- | ---- | ---- | Ornamental | 3 |
| **Archaeological samples [27]** | | | | |  |
| *C. pepo* ssp. *ovifera* | Arizona, USA | ---- | Putnam Shelter | ovi101 |  |
| Arizona, USA | ---- | Salts Bluff | ovi102 |  |
| Missouri, USA | ---- | 23BYM4 | ovi103 |  |
| Arizona, USA | ---- | Craddock Shelter | ovi104 |  |
| Arizona, USA | ---- | Cob Cave | ovi105 |  |
| *C. pepo* ssp. *fraterna* | Tamaulipas | ---- | Romero’s Cave | fra123 |  |
| *C. pepo* ssp. *pepo* | Tamaulipas | ---- | Romero’s Cave | pepo121 |  |
| Puebla | ---- | El Riego Cave, Puebla, México | pepo142 |  |
| New Mexico, USA | ---- | Bandelier Cave | pepo144 |  |
| New Mexico, USA | ---- | Bat Cave | pepo148 |  |
| **Modern samples [27]** | | | | |  |
| *C. pepo* ssp. *ovifera* var. *texana* | Texas, USA | ---- | ---- | KT898820 |  |
| *C. pepo* ssp. *ovifera* var. *ozarkana* | Oklahoma, USA | ---- | ---- | KT898818 |  |
| *C. pepo* ssp. *ovifera* var. *ovifera* | ---- | ---- | ---- | KT898817 |  |
| *C. pepo* ssp. *fraterna* | Tamaulipas | ---- | ---- | KT898816 |  |
| *C. pepo* ssp. *pepo* | ---- | ---- | ---- | KT898819 |  |

**Table S2.** Genetic diversity for two chloroplast concatenated regions (cpDNA: *petA*-*psb*J and *psbD-trnT*(GGU)) and nine nuclear microsatellite loci for *C. pepo* ssp. *pepo*, *Cucurbita pepo* ssp. *fraterna* and *C. pepo* ssp. *ovifera*. For cpDNA, N = number of individuals, S = segregating sites, h = haplotype number, *Hd* = haplotype diversity,  = nucleotide diversity. For microsatellite loci, N = number of individuals, *A* = allelic richness, *HO* = observed heterozygosity, *HE* = expected heterozygosity, *FIS*= inbreeding coefficient.

| Group | | Location | ID | cpDNA | | | | | Nuclear microsatellite loci | | | | |
| --- | --- | --- | --- | --- | --- | --- | --- | --- | --- | --- | --- | --- | --- |
| N | S | h | *Hd* | ** | N | *A* | *HO* | *HE* | *FIS* |
| *C. pepo* ssp*. pepo* | Improved commercial varieties | Black beauty zucchini | Bbz | 2 | 0 | 1 | 0 | 0 | 3 | 1.778 | 0.222 | 0.315 | 0.294 |
| Cocozelle | Coco | 6 | 4 | 3 | 0.7330 | 0.0009 | 9 | 2.222 | 0.384 | 0.394 | 0.025* |
| Straightneck | Strai | 3 | 4 | 2 | 0.6667 | 0.0016 | 3 | 1.778 | 0.222 | 0.25 | 0.111 |
| Delicata honey boat | Deli | 3 | 4 | 2 | 0.6667 | 0.0016 | 8 | 1.333 | 0.069 | 0.079 | 0.125 |
| Spaghetti | Spa | 15 | 0 | 1 | 0 | 0 | 13 | 1.889 | 0.184 | 0.185 | 0.005 |
| **Total** |  | **29** | **5** | **5** | **0.6773** | **0.0007** | **36** | **4.111** | **0.216** | **0.638** | **0.101** |
| Mexican *C. pepo* ssp. *pepo* landraces | Chihuahua | Chi | 20 | 0 | 1 | 0 | 0 | 27 | 3.889 | 0.331 | 0.454 | 0.27* |
| Durango | Dgo | 20 | 0 | 1 | 0 | 0 | 15 | 3.333 | 0.472 | 0.513 | 0.078 |
| Jalisco | Jal | 20 | 0 | 1 | 0 | 0 | 33 | 4 | 0.385 | 0.502 | 0.232* |
| San Luís Potosí | SLP | 18 | 0 | 1 | 0 | 0 | 18 | 4.222 | 0.472 | 0.511 | 0.077 |
| Zacatecas | Zac | 20 | 0 | 1 | 0 | 0 | 18 | 4.111 | 0.459 | 0.556 | 0.175* |
| Guanajuato | Gto | 31 | 0 | 1 | 0 | 0 | 16 | 3 | 0.514 | 0.482 | -0.068 |
| Tlaxcala | Tlax | 20 | 0 | 1 | 0 | 0 | 23 | 4.778 | 0.483 | 0.547 | 0.118* |
| Puebla | Pue | 30 | 1 | 2 | 0.4598 | 0.0003 | 31 | 4 | 0.407 | 0.475 | 0.143* |
| Hidalgo | Hgo | 20 | 0 | 1 | 0 | 0 | 20 | 2.778 | 0.229 | 0.293 | 0.219* |
| Edo. Mex | Emex | 20 | 0 | 1 | 0 | 0 | 20 | 4 | 0.6 | 0.548 | -0.095 |
| Michoacan | Mich | 20 | 0 | 1 | 0 | 0 | 19 | 4.111 | 0.36 | 0.46 | 0.218* |
| Oaxaca | Oax | 20 | 0 | 1 | 0 | 0 | 18 | 3.889 | 0.503 | 0.485 | -0.037 |
| Chiapas | Chiap | 20 | 0 | 1 | 0 | 0 | 33 | 5.444 | 0.368 | 0.54 | 0.318* |
| **Total** | | **279** | **9** | **5** | **0.6318** | **0.0008** | **291** | **10.778** | **0.43** | **0.573** | **0.123*** |
| *C. pepo* ssp. *ovifera* | | | Ovi | 25 | 18 | 3 | 0.2900 | 0.0014 | 18 | 3.889 | 0.614 | 0.564 | -0.089* |
| *C. pepo* ssp. *fraterna* | | | Fra | 22 | 1 | 2 | 0.5195 | 0.0003 | 29 | 2.889 | 0.129 | 0.292 | 0.559* |

**p*<0.05

**Table S3.** **a)** Posterior probability and confidence intervals [C.I.]for the direct and logistic methods for model selection between four scenarios of the origin of cultivated landraces of *C. pepo* in Mexico based on nine nuclear microsatellite loci and two partitioned chloroplast regions (*petA*-*psb*J and *psbD-trnT*(GGU)) obtained with DIYABC; the ancestor tested appears in parenthesis. Best supported scenarios for each method shown in bold. **b)** Type I (rows) and type II (columns) error rates based on the direct/logistic methods to assess confidence in scenario choice (main diagonal; best supported scenarios shown in bold), based on 1,000 newly simulated datasets.

| a) Posterior probability | Scenario 1 (*C. pepo* ssp. *ovifera*) | Scenario 2 (*C. pepo* ssp. *fraterna*) | Scenario 3 (unknown) | Scenario 4 (hybrid) |
| --- | --- | --- | --- | --- |
| Direct | 0.0820 [0.0000,0.3225] | **0.5440 [0.1074,0.9806]** | 0.1020 [0.0000,0.3673] | 0.2720 [0.0000,0.6621] |
| Logistic | 0.3006 [0.2370,0.3641] | 0.0006 [0.0000,0.1327] | 0.0006 [0.0000,1.0000] | **0.6982 [0.6708,0.7257]** |
| b) Type I (rows) and type II (columns) error rates for each scenario for the direct and logistic methods | | | | |
| Scenario 1 | 0.895/0.944 | 0/0 | 0.089/0.001 | 0.016/0.056 |
| Scenario 2 | 0/0 | **1/0.969** | 0/0 | 0/0.31 |
| Scenario 3 | 0/0.005 | 0/0 | 1/0.995 | 0/0 |
| Scenario 4 | 0.191/0.005 | 0.185/0.001 | 0.057/0 | **0.567/0.994** |

**Table S4.** Observed proportion (simulated<observed) of summary statistics used for model checking in ABC analyses. Asterisks denote those summary statistics in each scenario that showed statistical differences from the values estimated from observed data.

| Summary statistics | Summary value | Observed proportion (simulated<observed) | | | |
| --- | --- | --- | --- | --- | --- |
| Scenario 1 | Scenario 2 | Scenario 3 | Scenario 4 |
| VAR_1_1 | 8.194 | 0.938 | 0.999*** | 0.627 | 0.783 |
| VAR_1_2 | 9.633 | 0.99** | 0.976* | 0.7375 | 0.95* |
| VAR_1_3 | 0.742 | 0.979* | 0.849 | 0.967* | 0.977* |
| MGW_1_1 | 0.642 | 0*** | 0*** | 0.0215* | 0*** |
| MGW_1_2 | 0.427 | 0.001*** | 0*** | 0.028* | 0.0035** |
| MGW_1_3 | 0.677 | 0*** | 0*** | 0.004** | 0*** |
| V2P_1_1&2 | 8.974 | 0.957* | 0.99** | 0.614 | 0.819 |
| V2P_1_1&3 | 9.454 | 0.968* | 1*** | 0.619 | 0.85 |
| V2P_1_2&3 | 9.405 | 0.985* | 0.839 | 0.664 | 0.92 |
| LIK_1_1&2 | 2.127 | 0.101 | 0*** | 0.017* | 0.0635 |
| LIK_1_1&3 | 3.254 | 0.041* | 0.132 | 0.031* | 0.23 |
| LIK_1_2&1 | 2.729 | 0.844 | 0.134 | 0.1245 | 0.756 |
| LIK_1_2&3 | 3.762 | 0.384 | 0.2315 | 0.2465 | 0.305 |
| LIK_1_3&1 | 2.828 | 0.677 | 0.879 | 0.225 | 0.909 |
| LIK_1_3&2 | 2.473 | 0.3205 | 0.038* | 0.153 | 0.189 |
| DAS_1_1&2 | 0.224 | 0.9945** | 1*** | 0.9955** | 0.995** |
| DAS_1_1&3 | 0.147 | 0.8175 | 0.7495 | 0.805 | 0.4045 |
| DAS_1_2&3 | 0.166 | 0.8495 | 0.9445 | 0.8605 | 0.8805 |
| DM2_1_1&2 | 12.521 | 0.981* | 0.288 | 0.542 | 0.942 |
| DM2_1_1&3 | 24.232 | 0.985* | 0.999*** | 0.659 | 0.972* |
| DM2_1_2&3 | 21.469 | 0.959* | 0.552 | 0.583 | 0.841 |
| VPD_2_1 | 0.000 | 0.073 | 0.108 | 0.0665 | 0.027* |
| VPD_2_2 | 15.882 | 1*** | 1*** | 0.992** | 0.998** |
| VPD_2_3 | 0.000 | 0.4665 | 0.475 | 0.442 | 0.463 |
| PSS_2_1 | 0.000 | 0.0895 | 0.108 | 0.067 | 0.0345* |
| PSS_2_2 | 12.000 | 1*** | 1*** | 0.9975** | 1*** |
| PSS_2_3 | 0.000 | 0.4665 | 0.475 | 0.4435 | 0.463 |
| MNS_2_1 | 0.000 | 0.073 | 0.108 | 0.0665 | 0.027* |
| MNS_2_2 | 1.000 | 0.5445 | 0.8795 | 0.629 | 0.621 |
| MNS_2_3 | 0.000 | 0.4665 | 0.475 | 0.442 | 0.463 |
| VNS_2_1 | 0.000 | 0.1835 | 0.25 | 0.172 | 0.0955 |
| VNS_2_2 | 0.000 | 0.4255 | 0.494 | 0.4515 | 0.4405 |
| VNS_2_3 | 0.000 | 0.4985 | 0.498 | 0.4975 | 0.4975 |
| NH2_2_1&2 | 3.000 | 0.335 | 0.413 | 0.2415 | 0.1945 |
| NH2_2_1&3 | 1.000 | 0.0425* | 0.085 | 0.027* | 0.015* |
| NH2_2_2&3 | 3.000 | 0.7275 | 0.924 | 0.735 | 0.732 |
| MP2_2_1&2 | 0.006 | 0.145 | 0.216 | 0.1275 | 0.054 |
| MP2_2_1&3 | 0.000 | 0.072 | 0.106 | 0.065 | 0.0255* |
| MP2_2_2&3 | 0.513 | 0.9375 | 0.9975** | 0.9345 | 0.903 |
| MPB_2_1&2 | 1.625 | 0.712 | 0.6715 | 0.4455 | 0.5375 |
| MPB_2_1&3 | 0.000 | 0.0425* | 0.085 | 0.027* | 0.015* |
| MPB_2_2&3 | 1.625 | 0.603 | 0.6325 | 0.4655 | 0.3615 |
| VPD_3_1 | 5.126 | 0.976* | 0.998** | 0.927 | 0.704 |
| VPD_3_2 | 0.000 | 0.236 | 0.3775 | 0.2105 | 0.236 |
| VPD_3_3 | 0.251 | 0.988* | 0.9815* | 0.968* | 0.9765* |
| PSS_3_1 | 8.000 | 0.9665* | 0.9395 | 0.823 | 0.599 |
| PSS_3_2 | 0.000 | 0.2775 | 0.3775 | 0.211 | 0.28 |
| PSS_3_3 | 0.000 | 0.4635 | 0.452 | 0.4085 | 0.428 |
| MNS_3_1 | 23.429 | 0.371 | 0.632 | 0.57 | 0.201 |
| MNS_3_2 | 0.000 | 0.236 | 0.3775 | 0.2105 | 0.236 |
| MNS_3_3 | 0.000 | 0.4635 | 0.452 | 0.408 | 0.425 |
| VNS_3_1 | 176.816 | 0.455 | 0.536 | 0.455 | 0.182 |
| VNS_3_2 | 0.000 | 0.4185 | 0.479 | 0.401 | 0.402 |
| VNS_3_3 | 0.000 | 0.4965 | 0.496 | 0.493 | 0.4935 |
| NH2_3_1&2 | 6.000 | 0.759 | 0.618 | 0.4585 | 0.3845 |
| NH2_3_1&3 | 5.000 | 0.6445 | 0.566 | 0.3965 | 0.305 |
| NH2_3_2&3 | 3.000 | 0.6895 | 0.824 | 0.5575 | 0.5855 |
| MP2_3_1&2 | 1.472 | 0.858 | 0.957* | 0.855 | 0.4185 |
| MP2_3_1&3 | 1.470 | 0.86 | 0.957* | 0.855 | 0.42 |
| MP2_3_2&3 | 0.342 | 0.8415 | 0.967* | 0.808 | 0.7145 |
| MPB_3_1&2 | 3.589 | 0.94 | 0.728 | 0.5445 | 0.6525 |
| MPB_3_1&3 | 1.246 | 0.416 | 0.656 | 0.21 | 0.169 |
| MPB_3_2&3 | 2.455 | 0.75 | 0.5415 | 0.408 | 0.285 |

**Figure S1.** Depiction of scenarios tested with ABC analyses. For scenario 1, *C. pepo* ssp. *ovifera* was defined as *C. pepo* ssp. *pepo*’s ancestor; for scenario 2, *C. pepo* ssp. *fraterna* was defined as *C. pepo* ssp. *pepo*’s ancestor; for scenario 3, an unknown lineagewas defined as *C. pepo* ssp. *pepo*’s ancestor; and for scenario 4, *C. pepo* ssp. *pepo* originated as an *C. pepo* ssp. *ovifera*- *C. pepo* ssp. *fraterna* hybrid.

**Figure S2.** Principal component analysis (PCA) for summary statistics obtained from Model checking analysis in DIYABC for each scenario. In each case the observed data set fell within simulated prior and posterior data, and PC1 and PC2 explained similar amounts of variance.

**Figure S3.** Results from the assignment test based on two concatenated chloroplast regions (*petA*-*psb*J and *psbD-trnT*(GGU)) for *Cucurbita pepo* performed with adegenet. Blue crosses refer to the assignation to each cluster prior to the analysis. Coloured rectangles refer to the assignation probability to each cluster from low (clear yellow) to high (red) after the analysis. Right panel depicts a zoom-in for the assignation probability to each cluster for *C. pepo* improved varieties only.

**Figure S4.** Heatmap for pairwise *FST* values for chloroplast haplotypes (concatenated *petA*-*psb*J and *psbD-trnT*(GGU)) above diagonal and pairwise *RST* values for nine nuclear microsatellite loci below diagonal in *Cucurbita pepo*. Darker colours depict higher values of genetic differentiation while white depicts absence of genetic differentiation.

Figure S5. Maps of species distribution models – current and past projections (mid-Holocene, Last Glacial Maximum (LGM), Last Interglacial (LIG)) – constructed from data and models reported in [9].
